# Supplementary material
Source: PubMed Central journal article supplement (PMC2646224)
Supplement: jn.108.097279_1.pdf [file jn.108.097279_1.pdf]

Supplemental Table 1. Daily servings of each food group among study participants stratified by *UGT1A1* genotype<sup>1</sup>

|                                       | <i>UGT1A1</i> genotype |                 |                 | <i>P</i> -value <sup>2</sup> |
|---------------------------------------|------------------------|-----------------|-----------------|------------------------------|
|                                       | 6/6                    | 6/7             | 7/7             |                              |
|                                       | Servings, n/d          |                 |                 |                              |
| <b>Food Groups<sup>3</sup></b>        |                        |                 |                 |                              |
| Total fruits & vegetables             | 4.2 (0.3, 17.4)        | 4.7 (0.4, 18.5) | 3.7 (0.9, 8.8)  | 0.96                         |
| Soy products                          | 0.4 (0, 3.3)           | 0.5 (0, 4.7)    | 0.3 (0, 2.7)    | 0.70                         |
| Citrus fruit                          | 0.8 (0, 10.4)          | 0.8 (0, 4.6)    | 0.7 (0, 2.3)    | 0.54                         |
| Cruciferous vegetables                | 0.4 (0, 2.6)           | 0.4 (0, 2.9)    | 0.4 (0, 2.1)    | 0.51                         |
| <b>Botanical families<sup>4</sup></b> |                        |                 |                 |                              |
| Total botanicals <sup>5</sup>         | 5.7 (0, 14.0)          | 5.8 (1.2, 14.9) | 5.3 (1.8, 10.4) | 0.53                         |
| <i>Cruciferae</i>                     | 0.4 (0, 5.2)           | 0.4 (0, 4.1)    | 0.3 (0, 1.0)    | 0.34                         |
| <i>Rosaceae</i>                       | 0.8 (0, 9.0)           | 0.7 (0, 4.4)    | 0.8 (0, 2.4)    | 0.81                         |
| <i>Solanaceae</i>                     | 0.9 (0, 3.4)           | 0.9 (0, 7.8)    | 0.9 (0, 3.6)    | 0.66                         |
| <i>Leguminosae</i>                    | 1.0 (0, 4.2)           | 1.1 (0, 4.8)    | 0.8 (0, 2.2)    | 0.43                         |
| <i>Rutaceae</i>                       | 0.6 (0, 4.7)           | 0.4 (0, 3.3)    | 0.5 (0, 2.8)    | 0.18                         |
| <i>Umbelliferae</i>                   | 0.3 (0, 2.3)           | 0.3 (0, 2.4)    | 0.3 (0, 1.0)    | 0.93                         |

<sup>1</sup> Values are means (ranges).

<sup>2</sup> For association of daily servings of each food group (outcome) and *UGT1A1* genotype (exposure) using linear regression

<sup>3</sup> Dietary variables obtained from FFQ

<sup>4</sup> Dietary variables obtained from 3DFR

<sup>5</sup> Daily servings excluding potatoes
