# Supplementary material
Source: PubMed Central journal article supplement (PMC2646224)
Supplement: jn.108.097279_2.pdf [file jn.108.097279_2.pdf]

Online Supporting Material

Supplemental Table 2. Total serum bilirubin concentrations among study participants grouped by daily servings of F&V<sup>1</sup>

| Food group <sup>2</sup> servings, n/d | Total bilirubin $\mu\text{mol/L}$ | <i>P</i> -value <sup>4</sup> | Botanical family <sup>3</sup> servings, n/d | Total bilirubin $\mu\text{mol/L}$ | <i>P</i> -value <sup>4</sup> |
|---------------------------------------|-----------------------------------|------------------------------|---------------------------------------------|-----------------------------------|------------------------------|
| <b>Total fruits &amp; vegetables</b>  |                                   |                              | <b>Total Botanicals</b>                     |                                   |                              |
| <4                                    | 13.8 (13.0 , 14.7)                | 0.17                         | <4                                          | 13.5 (12.5 , 14.7)                | 0.79                         |
| 4-5                                   | 13.3 (12.7 , 13.9)                |                              | 4-5                                         | 13.4 (12.8 , 14.1)                |                              |
| >5                                    | 12.8 (11.7 , 13.8)                |                              | >5                                          | 13.3 (12.6 , 14.1)                |                              |
| <b>Soy products</b>                   |                                   |                              | <i>Cruciferae</i>                           |                                   |                              |
| <0.5                                  | 13.5 (12.8 , 14.1)                | 0.80                         | <0.5                                        | 13.2 (12.5 , 13.9)                | 0.18                         |
| 0.5+                                  | 13.3 (12.1 , 14.5)                |                              | 0.5+                                        | 14.3 (12.9 , 15.8)                |                              |
| <b>Citrus fruit</b>                   |                                   |                              | <i>Rosaceae</i>                             |                                   |                              |
| <0.5                                  | 13.5 (12.6 , 14.4)                | 0.84                         | <0.5                                        | 13.7 (12.8 , 14.6)                | 0.46                         |
| 0.5+                                  | 13.3 (12.5 , 14.2)                |                              | 0.5+                                        | 13.2 (12.4 , 14.1)                |                              |
| <b>Cruciferous vegetables</b>         |                                   |                              | <i>Leguminosae</i>                          |                                   |                              |
| <0.5                                  | 13.8 (13.1 , 14.5)                | 0.30                         | <0.5                                        | 13.4 (12.4 , 14.5)                | 0.99                         |
| 0.5+                                  | 12.5 (11.4 , 13.6)                |                              | 0.5+                                        | 13.4 (12.7 , 14.2)                |                              |
|                                       |                                   |                              | <i>Solanaceae</i>                           |                                   |                              |
|                                       |                                   |                              | <0.5                                        | 13.5 (12.5 , 14.5)                | 0.87                         |
|                                       |                                   |                              | 0.5+                                        | 13.4 (12.6 , 14.2)                |                              |
|                                       |                                   |                              | <i>Rutaceae</i>                             |                                   |                              |
|                                       |                                   |                              | <0.5                                        | 13.2 (12.5 , 14.0)                | 0.39                         |
|                                       |                                   |                              | 0.5+                                        | 13.8 (12.8 , 14.9)                |                              |
|                                       |                                   |                              | <i>Umbelliferae</i>                         |                                   |                              |
|                                       |                                   |                              | <0.5                                        | 13.5 (12.8 , 14.2)                | 0.58                         |
|                                       |                                   |                              | 0.5+                                        | 13.0 (11.7 , 14.5)                |                              |

<sup>1</sup> Bilirubin data were transformed  $\ln(x+1)$ . Back-transformed means and 95% CI (in parentheses) are presented.

<sup>2</sup> Dietary variables obtained from FFQ

<sup>3</sup> Dietary variables obtained from 3DFR

<sup>4</sup> Adjusted for race, sex, *UGT1A1* genotype, and total energy (total fruits & vegetables and total botanicals) or total fruits & vegetables (soy products, citrus fruit, cruciferous vegetables, and all individual botanical families) using multiple linear regression

## Online Supporting Material
